# Supplementary material for: Soybean GmbZIP123 gene enhances lipid content in the seeds of transgenic Arabidopsis plants
Source: PubMed Central journal article supplement (PMC3808315; doi:10.1093/jxb/ert238), 2013-08-20
Supplement: supp_ert238_jexbot098277_file001.pdf [file supp_ert238_jexbot098277_file001.pdf]

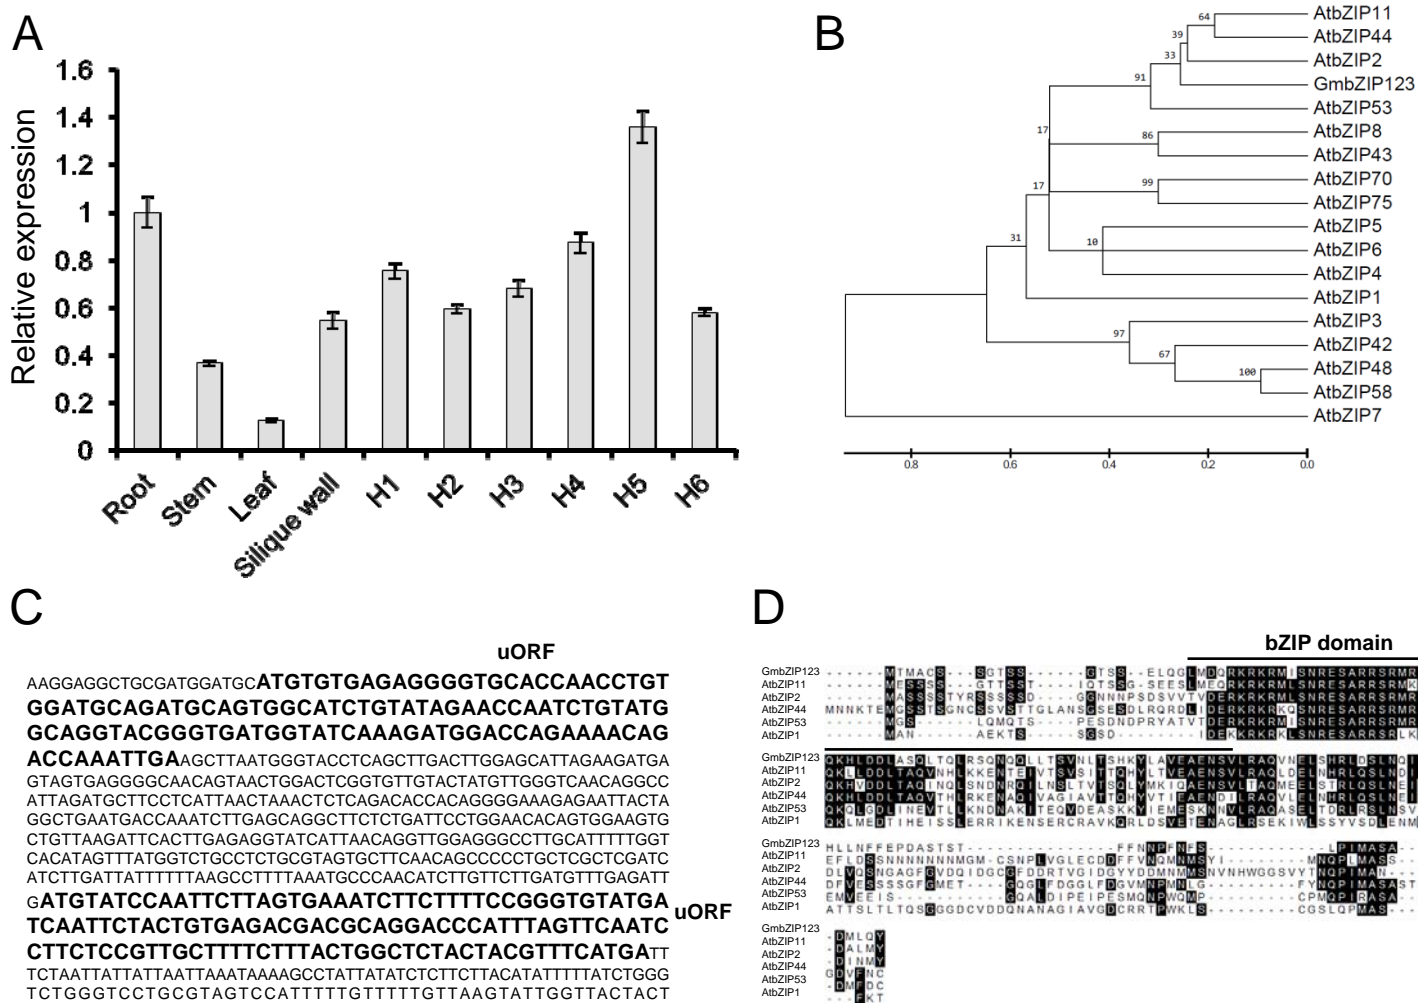

**Figure S1.** Expression pattern and sequence features of soybean *GmbZIP123* gene. **A**, Expression pattern of *GmbZIP123* in soybean various tissues analyzed by qRT-PCR. The relative expression level of *GmbZIP123* was normalized using *TUBULIN* as an internal control. **B**, Phylogenetic analysis of *GmbZIP123* and Arabidopsis group S bZIP TFs. **C**, The 5'UTR sequence of *GmbZIP123* gene. uORF was highlighted in bold. **D**, Protein sequence alignment of *GmbZIP123* and Arabidopsis group S1 bZIP transcription factors.

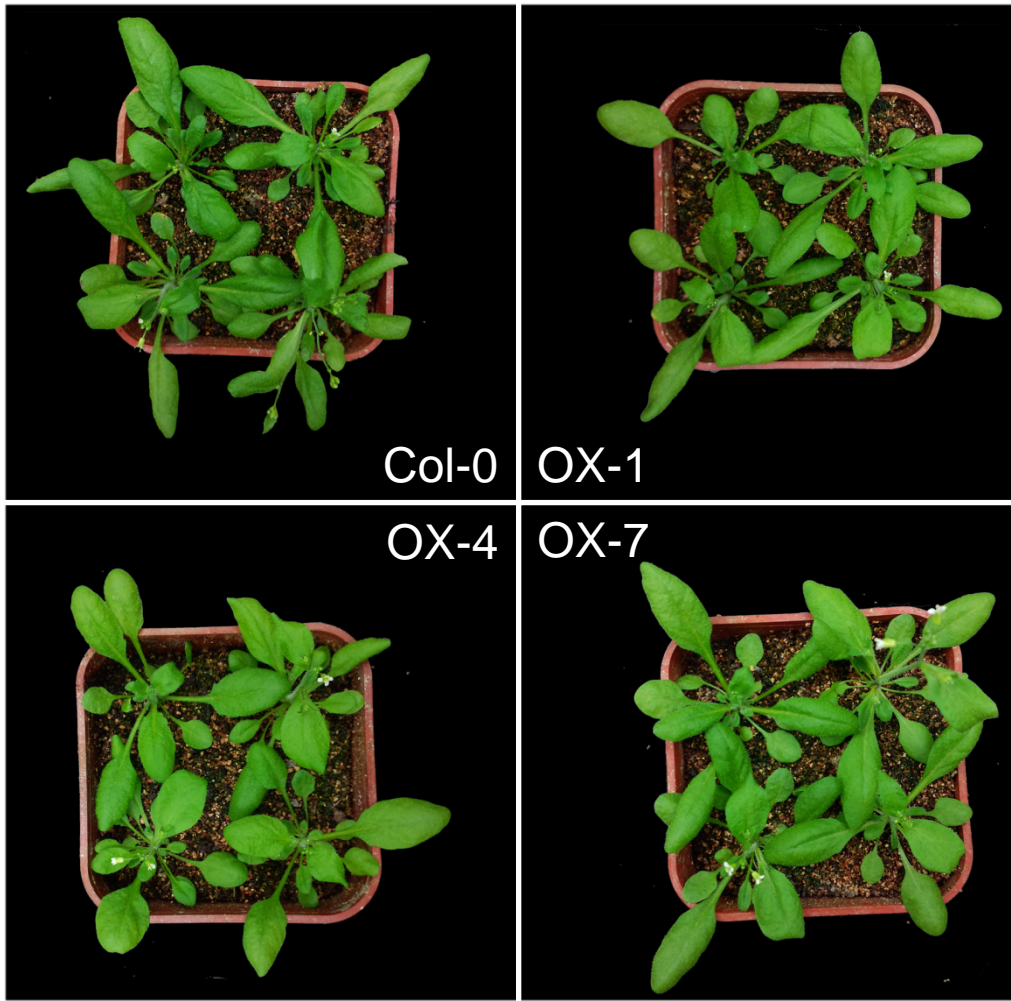

**Figure S2.** Phenotype of Col-0 and *GmbZIP123* transgenic plants (OX-1, 4, 7).
